# Supplementary material for: Radiation alters PD-L1/NKG2D ligand levels in lung cancer cells and leads to immune escape from NK cell cytotoxicity via IL-6-MEK/Erk signaling pathway
Source: PubMed Central journal article supplement (PMC5655216; doi:10.18632/oncotarget.19193), 2017-07-12
Supplement: oncotarget-08-80506-s001.pdf [file oncotarget-08-80506-s001.pdf]

# Radiation alters PD-L1/NKG2D ligand levels in lung cancer cells and leads to immune escape from NK cell cytotoxicity via IL-6-MEK/Erk signaling pathway

## SUPPLEMENTARY MATERIALS

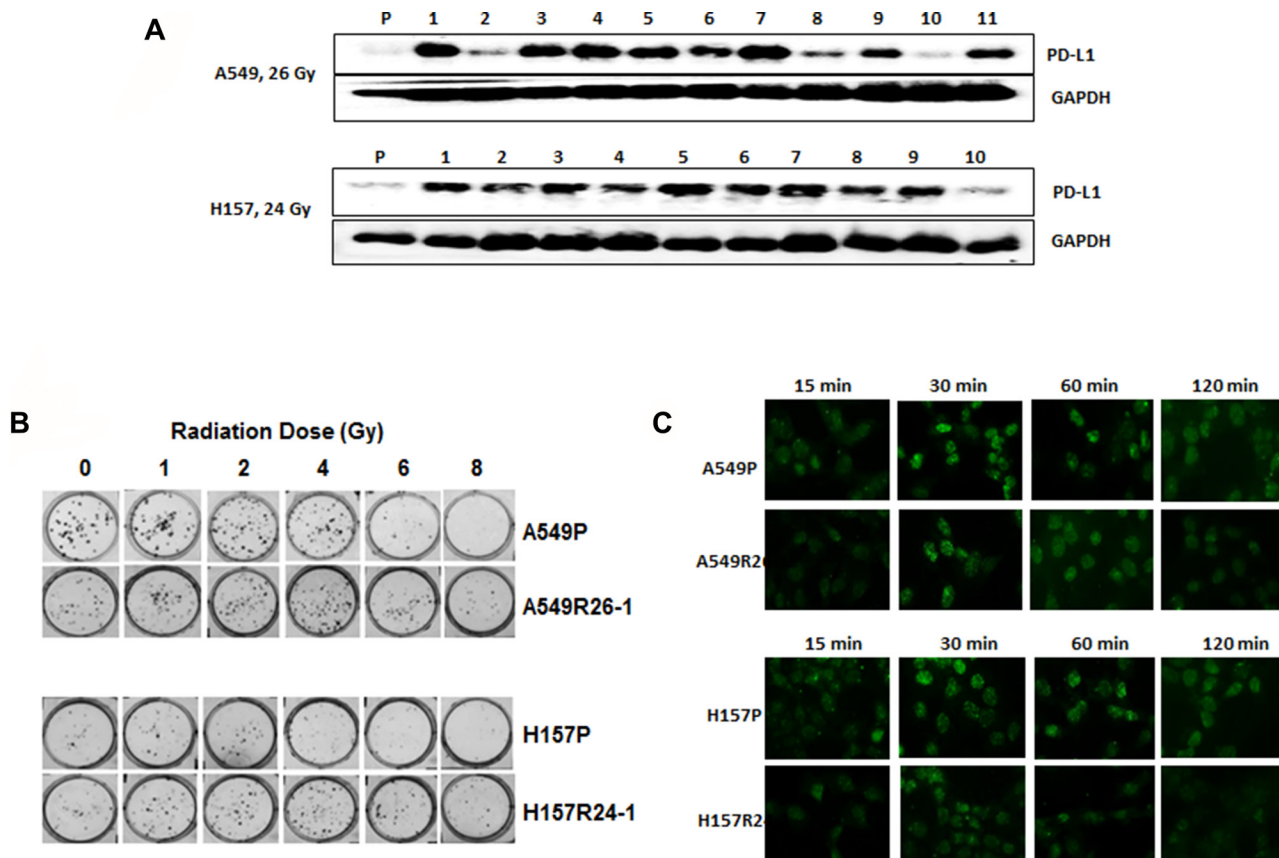

**Supplementary Figure 1: Development of radioresistant sub-cell lines of NSCLC.** (A) PD-L1 expressions in sub-line cells in cumulative 26 Gy-treated A549 and cumulative 24 Gy-treated H157 cells. (B) Images of 6-well plates used in clonogenic assays testing radioresistance of A549P vs. A549R26-1 and H157P vs. H157R24-1 cells. (C) Images of  $\gamma$ H2AX staining of A549 vs. A549R26-1 and H157P vs. H157R24-1 cells at different time points after radiation (6 Gy).

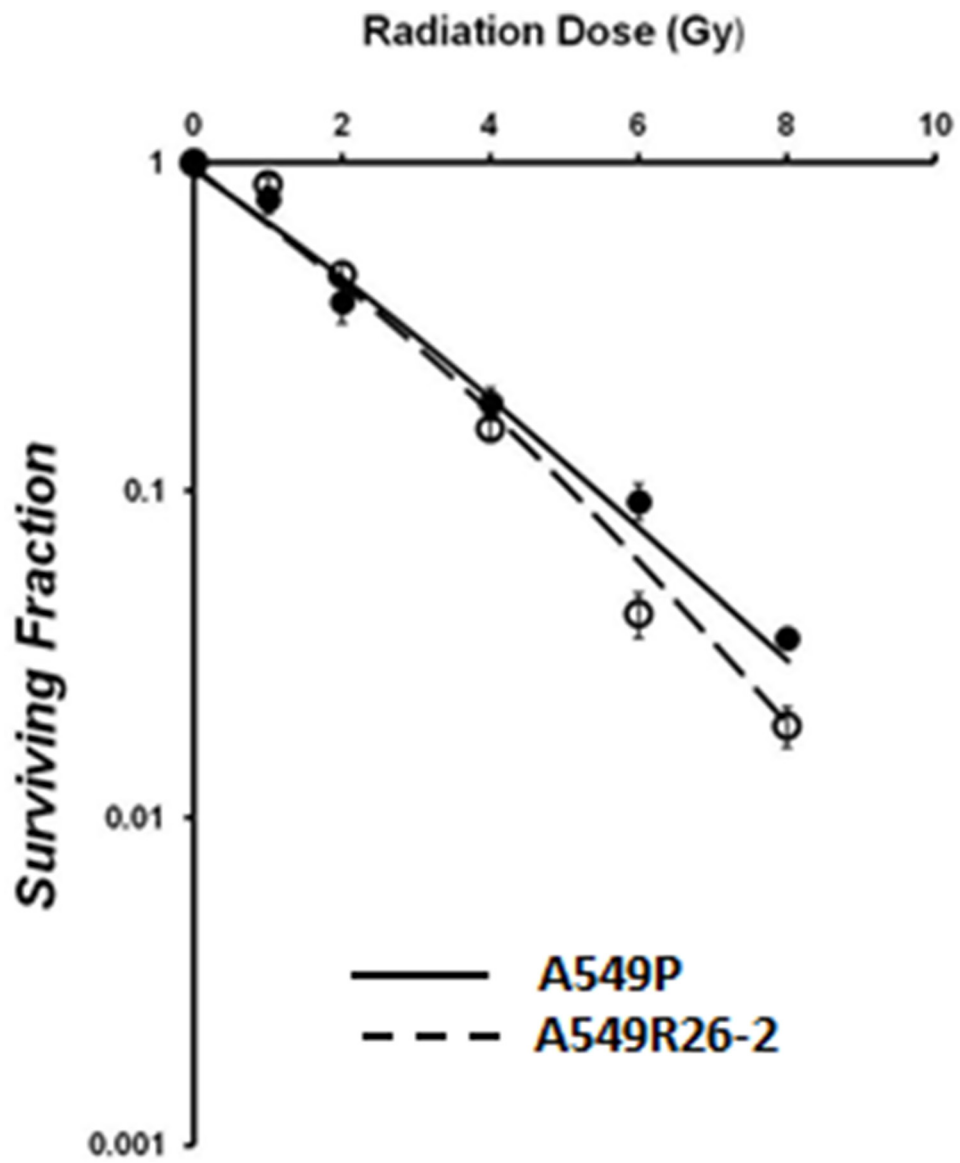

Supplementary Figure 2: Clonogenic assay of A549P vs. A549R26-2 cells.

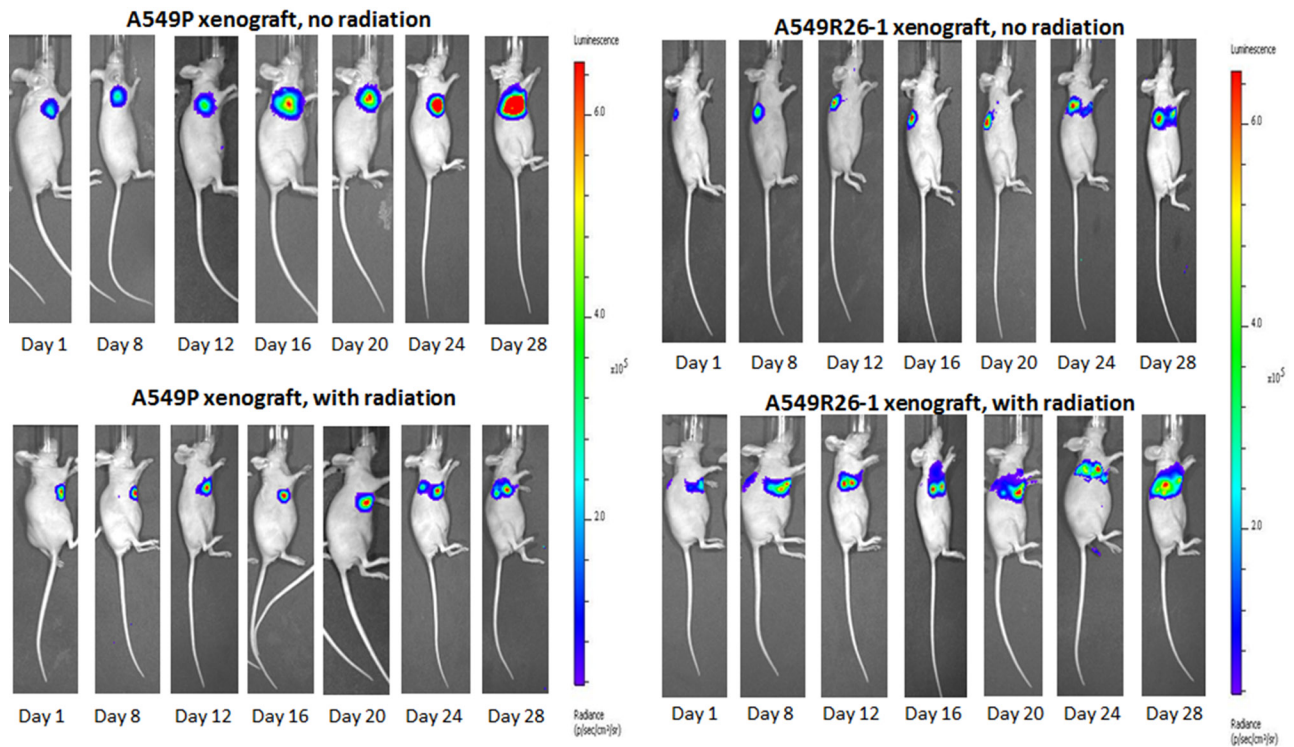

**Supplementary Figure 3: IVIS Images of a representative mouse of each group showing tumor regression differences after radiation.**
